# Supplementary material for: Seroprevalence of four endemic human coronaviruses antibodies among Filipino children and their cross-reactivity and neutralization capacity against SARS-CoV-2
Source: Research Square preprint supplement (doi:10.21203/rs.3.rs-2214727/v1), 2022-11-12
Supplement: Supplementary file 1 [file 870056163adc1240622f15c1.docx]

**Supplementary material**

**Title:**

Seroprevalence of four endemic human coronaviruses antibodies among Filipino children and their cross-reactivity and neutralization capacity against SARS-CoV-2

**Authors:**

Yusuke Sayama1*, Michiko Okamoto1, Mayuko Saito1, Mariko Saito-Obata1, Raita Tamaki2, Christine Dahlia Joboco3, Socorro Lupisan4, Hitoshi Oshitani1

1. Department of Virology, Tohoku University of Graduate School, Sendai, Japan.
2. Institute of Tropical Medicine, Nagasaki University, Nagasaki, Japan
3. Biliran Provincial Hospital, Biliran, Philippines.
4. Research Institute for Tropical Medicine, Metro Manila, Philippines.

**Keywords:** endemic human coronaviruses, SARS-CoV-2, antibody, cross-reactivity, neutralization, Philippines, Children

***Corresponding author:** Yusuke Sayama

Department of Virology, Tohoku University Graduate School of Medicine

Address: 2-1 Seiryo-machi, Aoba-ku, Sendai, Miyagi, 980-8575, Japan

Telephone: +81-(0)22-717-8211, FAX: +81-(0)22-717-8212

Email: sayama@med.tohoku.ac.jp


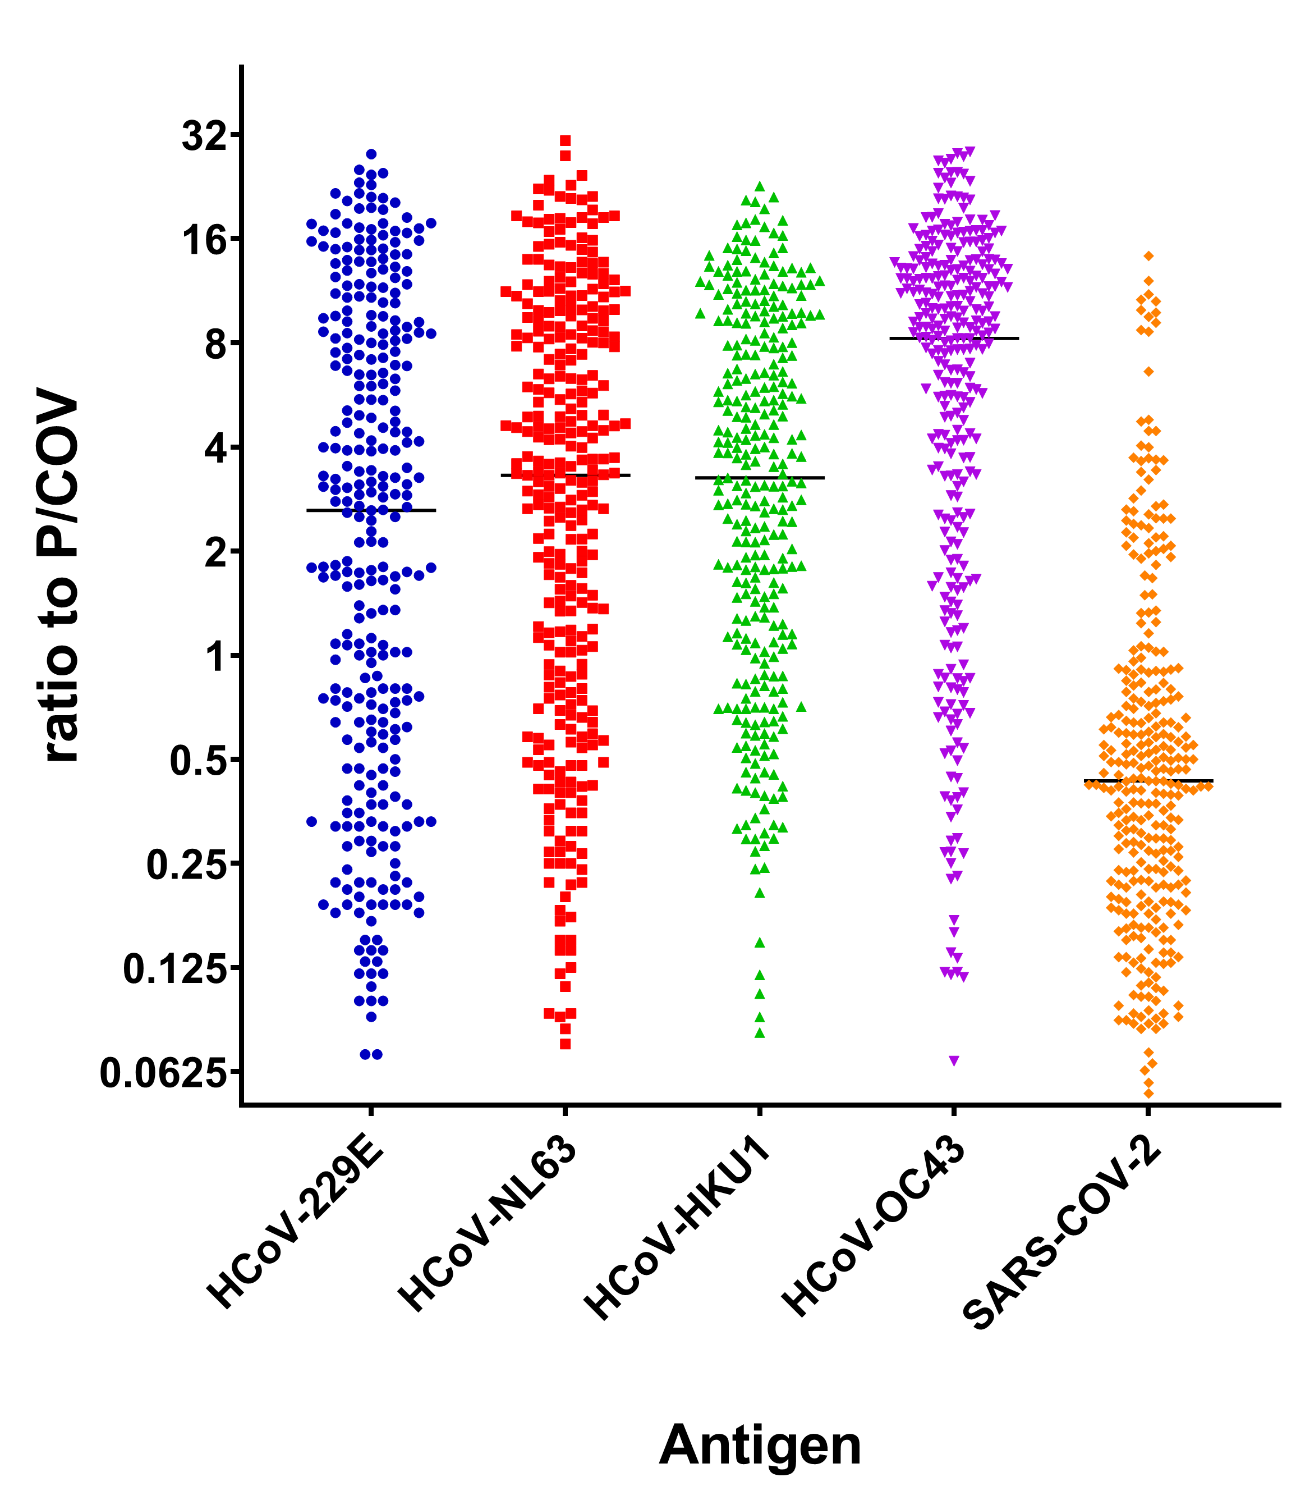


**Supplementary Figure S1.** Serum antibody levels against four HCoVs and SARS-CoV-2 expressed as ratios to positive (P)/cut off value (COV). Blue, anti-HCoV-229E; red, anti‑HCoV-NL63; green, anti-HCoV-HKU1; purple, anti-HCoV-OC43; orange, anti-SARS‑CoV-2.

**Supplementary Table S1.** Results of positivity by ELISA

| Age (months) | Number of test samples | HCoV-229E | | | | HCoV-NL63 | | | | HCoV-HKU1 | | | | HCoV-OC43 | | | | SARS-CoV-2 | | | | Four HCoVs and SARS-CoV-2 antigens | | | |
| --- | --- | --- | --- | --- | --- | --- | --- | --- | --- | --- | --- | --- | --- | --- | --- | --- | --- | --- | --- | --- | --- | --- | --- | --- | --- |
| Negative | % | Positive | % | Negative | % | Positive | % | Negative | % | Positive | % | Negative | % | Positive | % | Negative | % | Positive | % | Negative | % | Positive | % |
| <2 | 50 | 2 | 4.0 | 48 | 96.0 | 5 | 10.0 | 45 | 90.0 | 2 | 4.0 | 48 | 96.0 | 1 | 2.0 | 49 | 98.0 | 39 | 78.0 | 11 | 22.0 | 0 | 0 | 50 | 100 |
| 3-5 | 38 | 12 | 31.6 | 26 | 68.4 | 14 | 36.8 | 24 | 63.2 | 12 | 31.6 | 26 | 68.4 | 7 | 18.4 | 31 | 81.6 | 38 | 100 | 0 | 0 | 4 | 10.5 | 34 | 89.5 |
| 6-8 | 35 | 28 | 80.0 | 7 | 20.0 | 24 | 68.6 | 11 | 31.4 | 17 | 48.6 | 17 | 51.4 | 12 | 34.3 | 23 | 65.7 | 34 | 97.1 | 1 | 2.9 | 8 | 22.9 | 27 | 77.1 |
| 9-11 | 36 | 24 | 66.7 | 12 | 33.3 | 14 | 38.9 | 22 | 61.1 | 21 | 58.3 | 15 | 41.7 | 19 | 52.8 | 17 | 47.2 | 35 | 97.2 | 1 | 2.8 | 8 | 22.2 | 28 | 77.8 |
| 12-14 | 15 | 9 | 60.0 | 6 | 40.0 | 6 | 40.0 | 9 | 60.0 | 4 | 26.7 | 11 | 73.3 | 2 | 13.3 | 13 | 86.7 | 13 | 86.7 | 2 | 13.3 | 0 | 0 | 15 | 100 |
| 15-17 | 25 | 12 | 48.0 | 13 | 52.0 | 8 | 32.0 | 17 | 68.0 | 3 | 12.0 | 22 | 88.0 | 4 | 16.0 | 21 | 84.0 | 19 | 76.0 | 6 | 24.0 | 2 | 8.0 | 23 | 92.0 |
| 18-20 | 18 | 6 | 33.3 | 12 | 66.7 | 6 | 33.3 | 12 | 66.7 | 6 | 33.3 | 12 | 66.7 | 3 | 16.7 | 15 | 83.3 | 11 | 61.1 | 7 | 38.9 | 1 | 5.6 | 17 | 94.4 |
| 21-23 | 13 | 5 | 38.5 | 8 | 61.5 | 6 | 46.2 | 7 | 53.8 | 1 | 7.7 | 12 | 92.3 | 1 | 7.7 | 12 | 92.3 | 11 | 84.6 | 2 | 15.4 | 0 | 0 | 13 | 100 |
| 24-26 | 14 | 4 | 28.6 | 10 | 71.4 | 2 | 14.3 | 12 | 85.7 | 2 | 14.3 | 12 | 85.7 | 2 | 14.3 | 12 | 85.7 | 9 | 64.3 | 5 | 35.7 | 1 | 7.1 | 13 | 92.9 |
| 27-29 | 14 | 2 | 14.3 | 12 | 85.7 | 2 | 14.3 | 12 | 85.7 | 2 | 14.3 | 12 | 85.7 | 0 | 0 | 14 | 100 | 5 | 35.7 | 9 | 64.3 | 0 | 0 | 14 | 100 |
| 30-35 | 17 | 5 | 29.4 | 12 | 70.6 | 3 | 17.6 | 14 | 82.4 | 2 | 11.8 | 15 | 88.2 | 1 | 5.9 | 16 | 94.1 | 11 | 64.7 | 6 | 35.3 | 1 | 5.9 | 16 | 94.1 |
| 36-47 | 24 | 4 | 16.7 | 20 | 83.3 | 0 | 0 | 24 | 100 | 1 | 4.2 | 23 | 95.8 | 0 | 0 | 24 | 100 | 13 | 54.2 | 11 | 45.8 | 0 | 0 | 24 | 100 |
| 48-59 | 16 | 1 | 6.3 | 15 | 93.8 | 0 | 0 | 16 | 100 | 0 | 0 | 16 | 100 | 0 | 0 | 16 | 100 | 8 | 50.0 | 8 | 50.0 | 0 | 0 | 16 | 100 |
| Total | 315 | 114 | 36.2 | 201 | 63.8 | 90 | 28.6 | 225 | 71.4 | 73 | 23.2 | 241 | 76.5 | 52 | 16.5 | 263 | 83.5 | 246 | 78.1 | 69 | 21.9 | 25 | 7.9 | 290 | 92.1 |
